# Supplementary material
Source: ML conference proceedings conference paper supplement (https://openaccess.thecvf.com/content/ICCV_2019/html/Shi_Face-to-Parameter_Translation_for_ICCV_2019_paper.html)
Supplement: Supplementary file 1 [file Shi_Face-to-Parameter_Translation_for_ICCV_2019_supplemental.pdf]

# Face-to-Parameter Translation for Game Character Auto-Creation

## *Supplementary Material*

### 1 Configurations of our networks

A detailed configuration of our Imitator  $G$  and Face Segmentation Network  $F_2$  are listed in Table 1 and Table 2. As for the details of Face Recognition Network  $F_1$ , i.e. Light CNN-29 v2, please refer to Wu *et al.*'s paper [5].

Specifically, in a  $c \times w \times w/s$  of Convolution / Deconvolution layer,  $c$  denotes the number of filters,  $w \times w$  denotes the filter's size and  $s$  denotes the filter's stride. In a  $w \times w/s$  of Maxpool layer,  $w$  denotes the pooling window size, and  $s$  denotes the pooling stride. In an  $n/s$  Bottleneck block [3],  $n$  denotes the number of planes, and  $s$  denotes the block's stride.

|          | Layer  | Component                 | Configuration | Output Size |
|----------|--------|---------------------------|---------------|-------------|
| Imitator | Conv_1 | Deconvolution + BN + ReLU | 512x4x4 / 1   | 4x4         |
|          | Conv_2 | Deconvolution + BN + ReLU | 512x4x4 / 2   | 8x8         |
|          | Conv_3 | Deconvolution + BN + ReLU | 512x4x4 / 2   | 16x16       |
|          | Conv_4 | Deconvolution + BN + ReLU | 256x4x4 / 2   | 32x32       |
|          | Conv_5 | Deconvolution + BN + ReLU | 128x4x4 / 2   | 64x64       |
|          | Conv_6 | Deconvolution + BN + ReLU | 64x4x4 / 2    | 128x128     |
|          | Conv_7 | Deconvolution + BN + ReLU | 64x4x4 / 2    | 256x256     |
|          | Conv_8 | Deconvolution             | 3x4x4 / 2     | 512x512     |

Table 1: A detailed configuration of our Imitator  $G$ .

|                    | Layer   | Component               | Configuration | Output Resolution                |
|--------------------|---------|-------------------------|---------------|----------------------------------|
| Segmentation Model | Conv_1  | Convolution + BN + ReLU | 64x7x7 / 2    | $\frac{1}{2} \times \frac{1}{2}$ |
|                    | MaxPool | MaxPool                 | 3x3 / 2       | $\frac{1}{4} \times \frac{1}{4}$ |
|                    | Conv_2  | 3 x Bottleneck          | 64 / 2        | $\frac{1}{8} \times \frac{1}{8}$ |
|                    | Conv_3  | 4 x Bottleneck          | 128 / 1       | $\frac{1}{8} \times \frac{1}{8}$ |
|                    | Conv_4  | 6 x Bottleneck          | 256 / 1       | $\frac{1}{8} \times \frac{1}{8}$ |
|                    | Conv_5  | 3 x Bottleneck          | 512 / 1       | $\frac{1}{8} \times \frac{1}{8}$ |
|                    | Conv_6  | Convolution             | 11x1x1 / 1    | $\frac{1}{8} \times \frac{1}{8}$ |

Table 2: A detailed configuration of our Face Segmentation Model  $F_2$ .

## 2 More examples of generated in-game characters

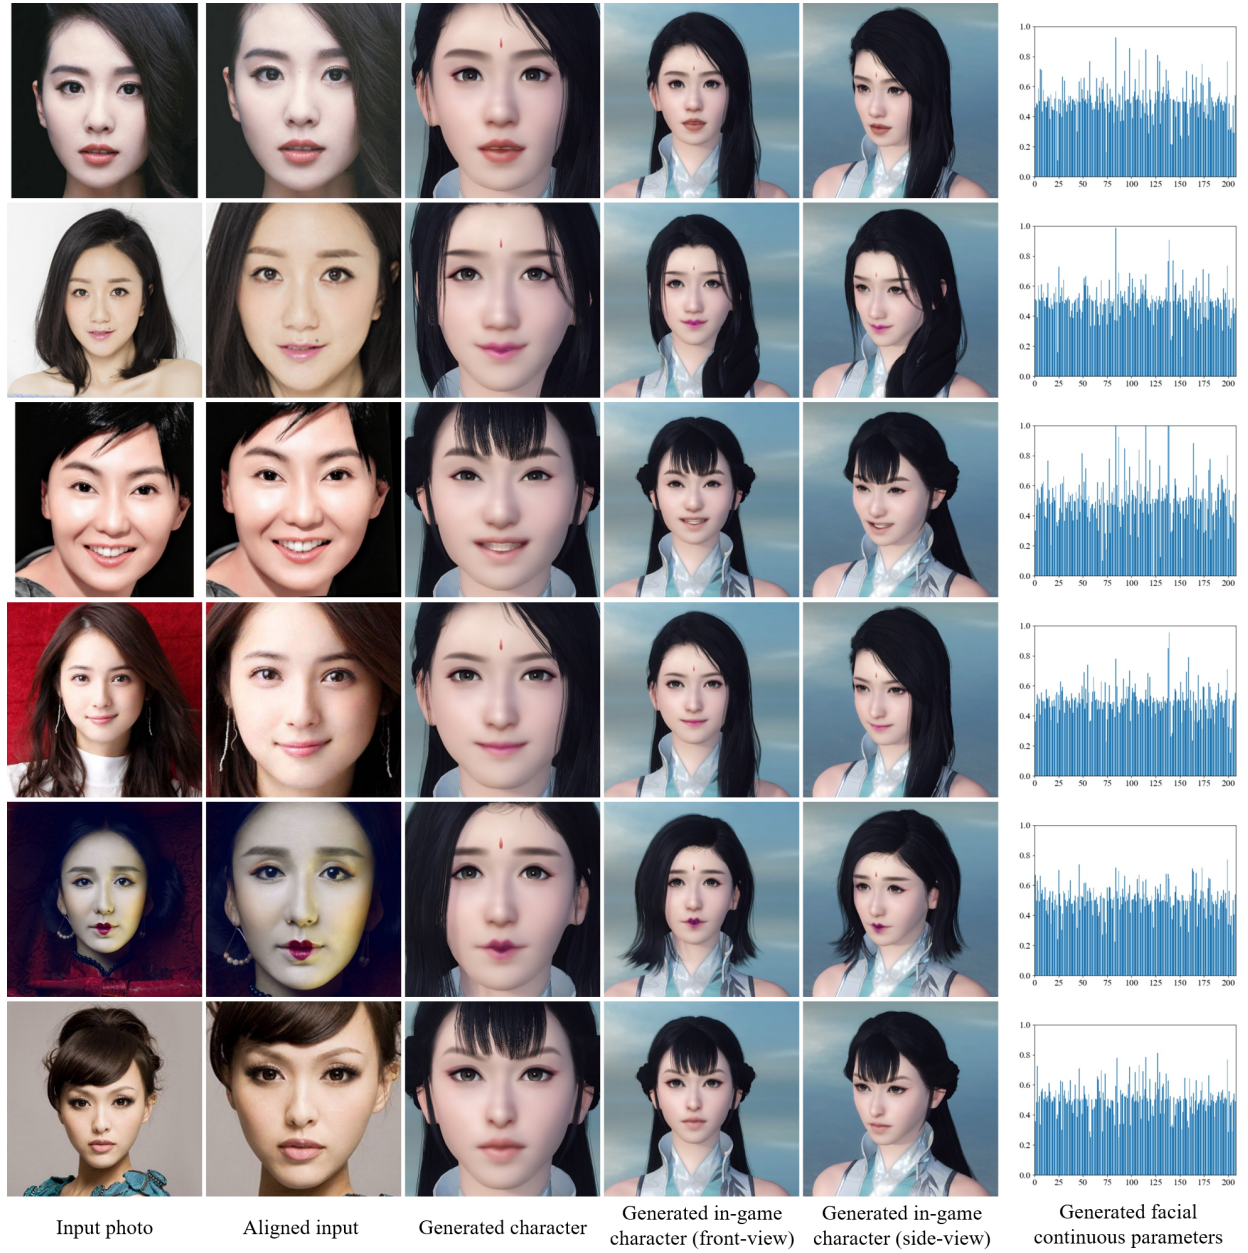

Figure 1: More generated in-game characters (female).

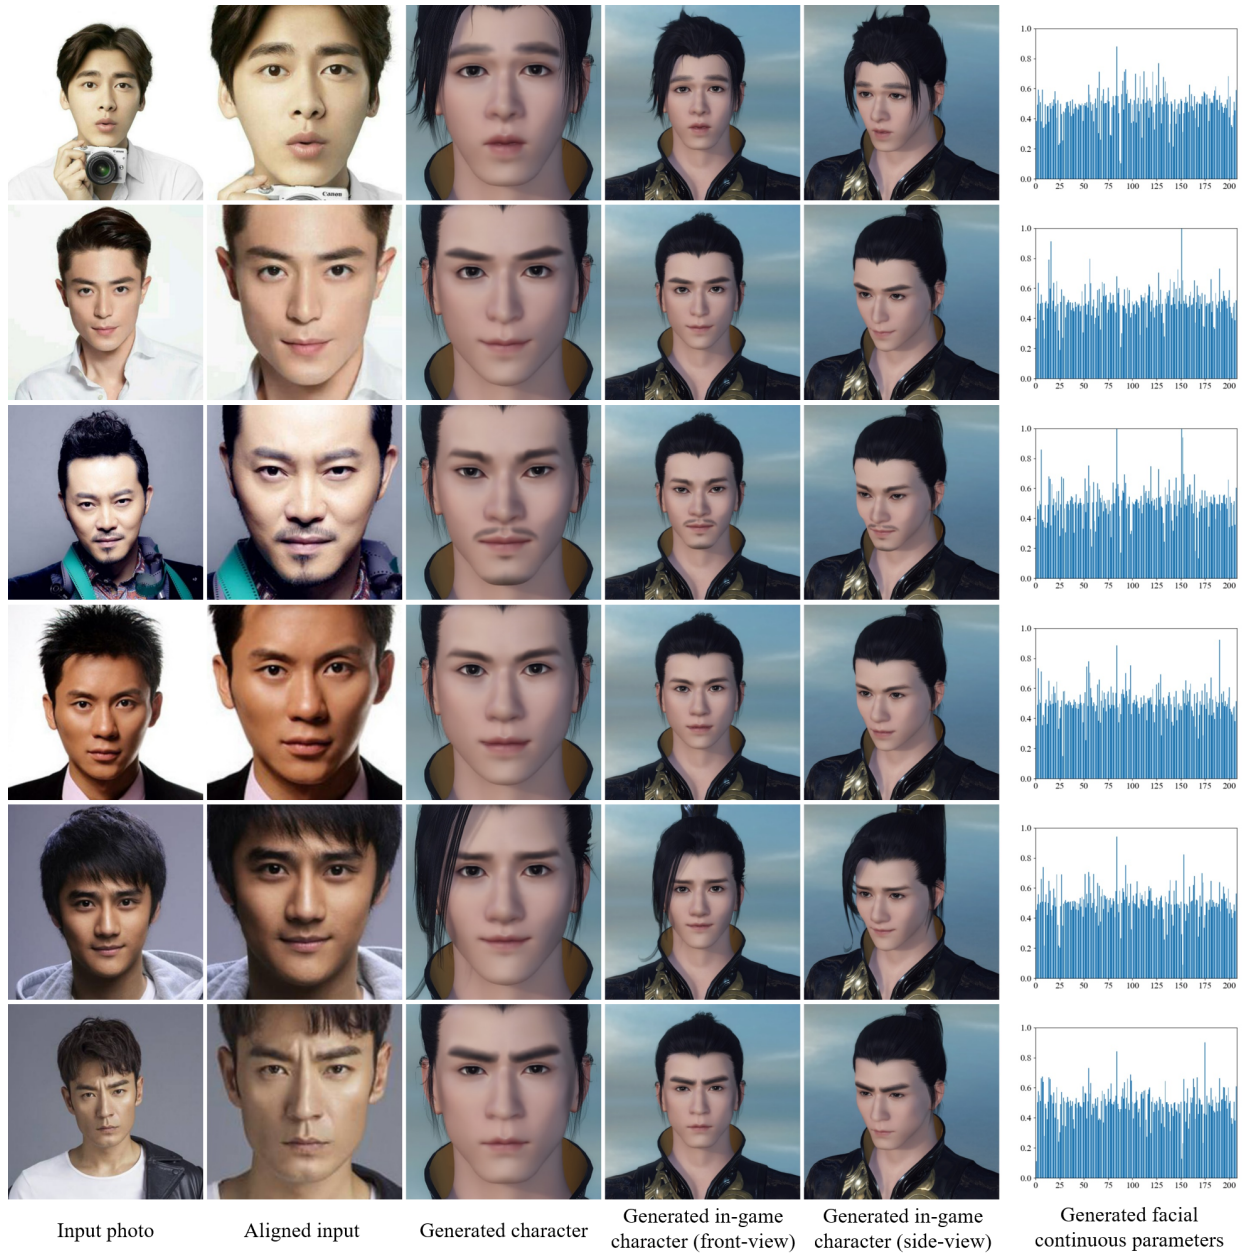

Figure 2: More generated in-game characters (male).

### 3 More comparison results

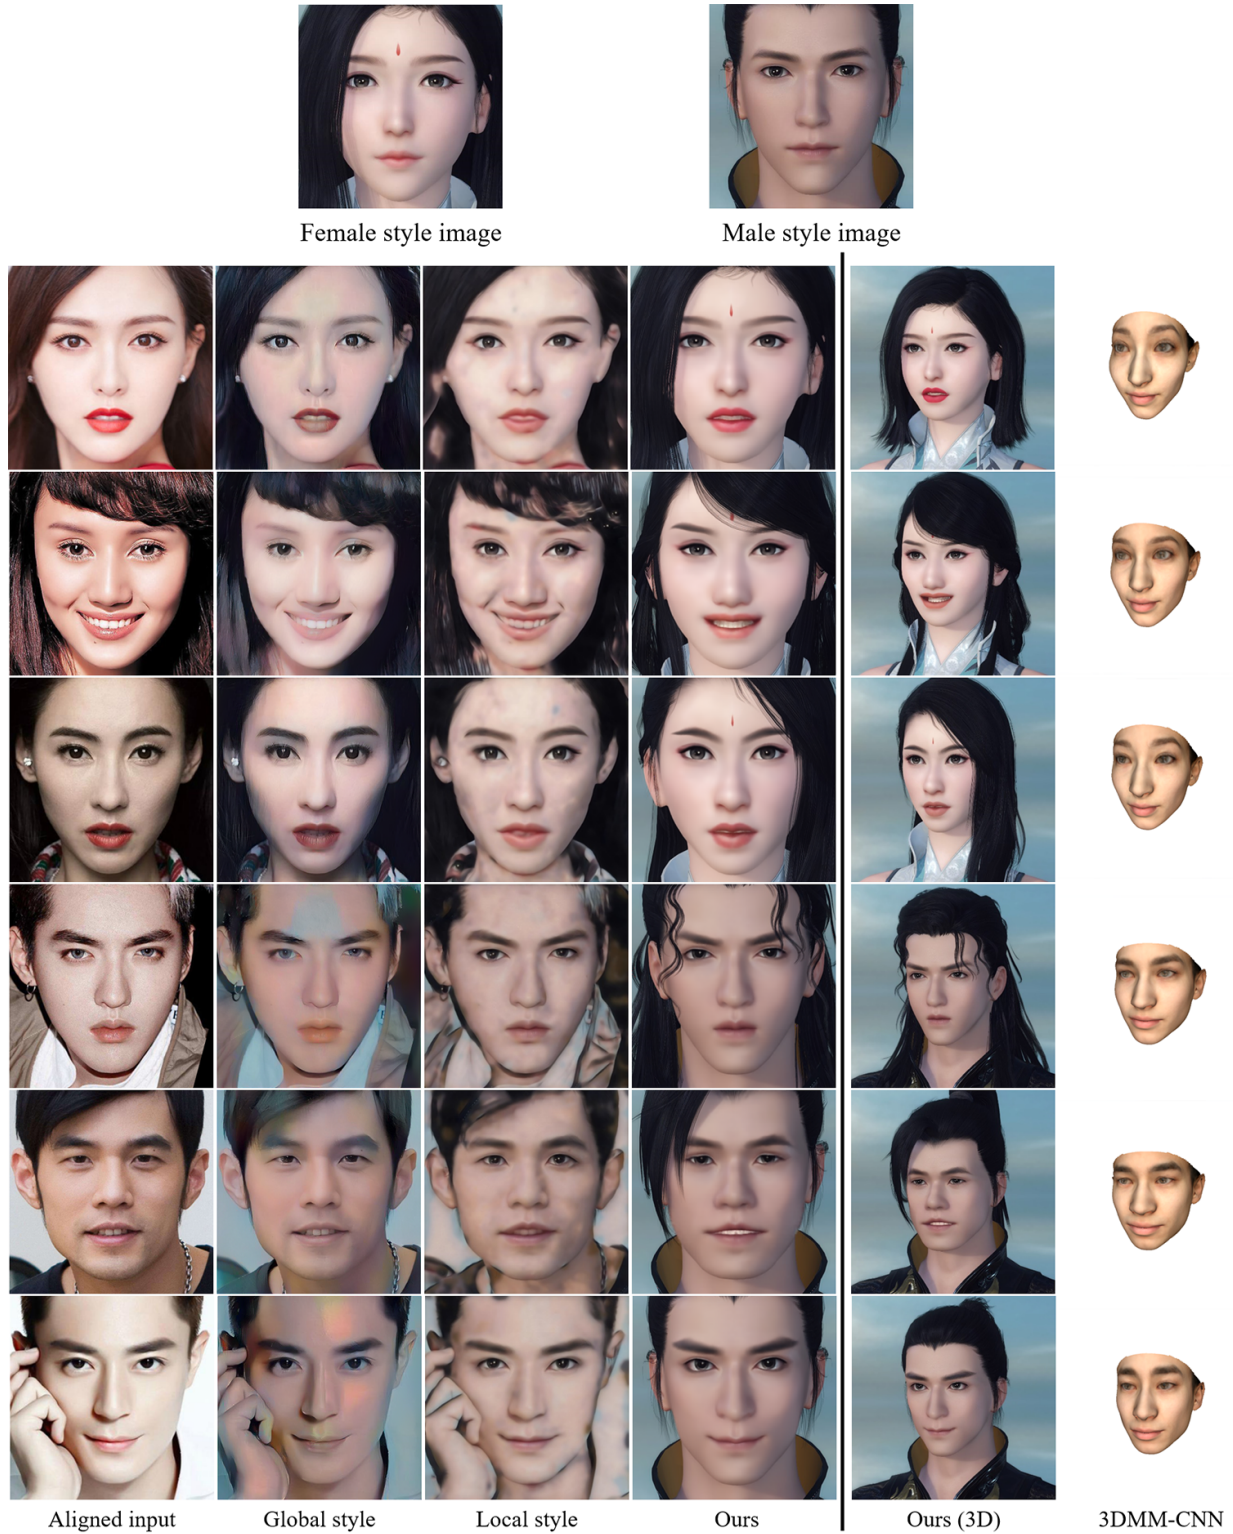

Figure 3: More comparison results with other NST methods: Global style [1] and Local style [2]. We use the “average face” of each gender as the style images. We also compare with a popular monocular 3D face reconstruction method: 3DMM-CNN [4].

## 4 Training samples of our Imitator

During the training process, we train our imitator with randomly generated game faces other than regular ones, as shown in Fig. 4. In our experiment, we adopt two imitators to fit female and male 3D models respectively, in order to auto-create characters for different genders.

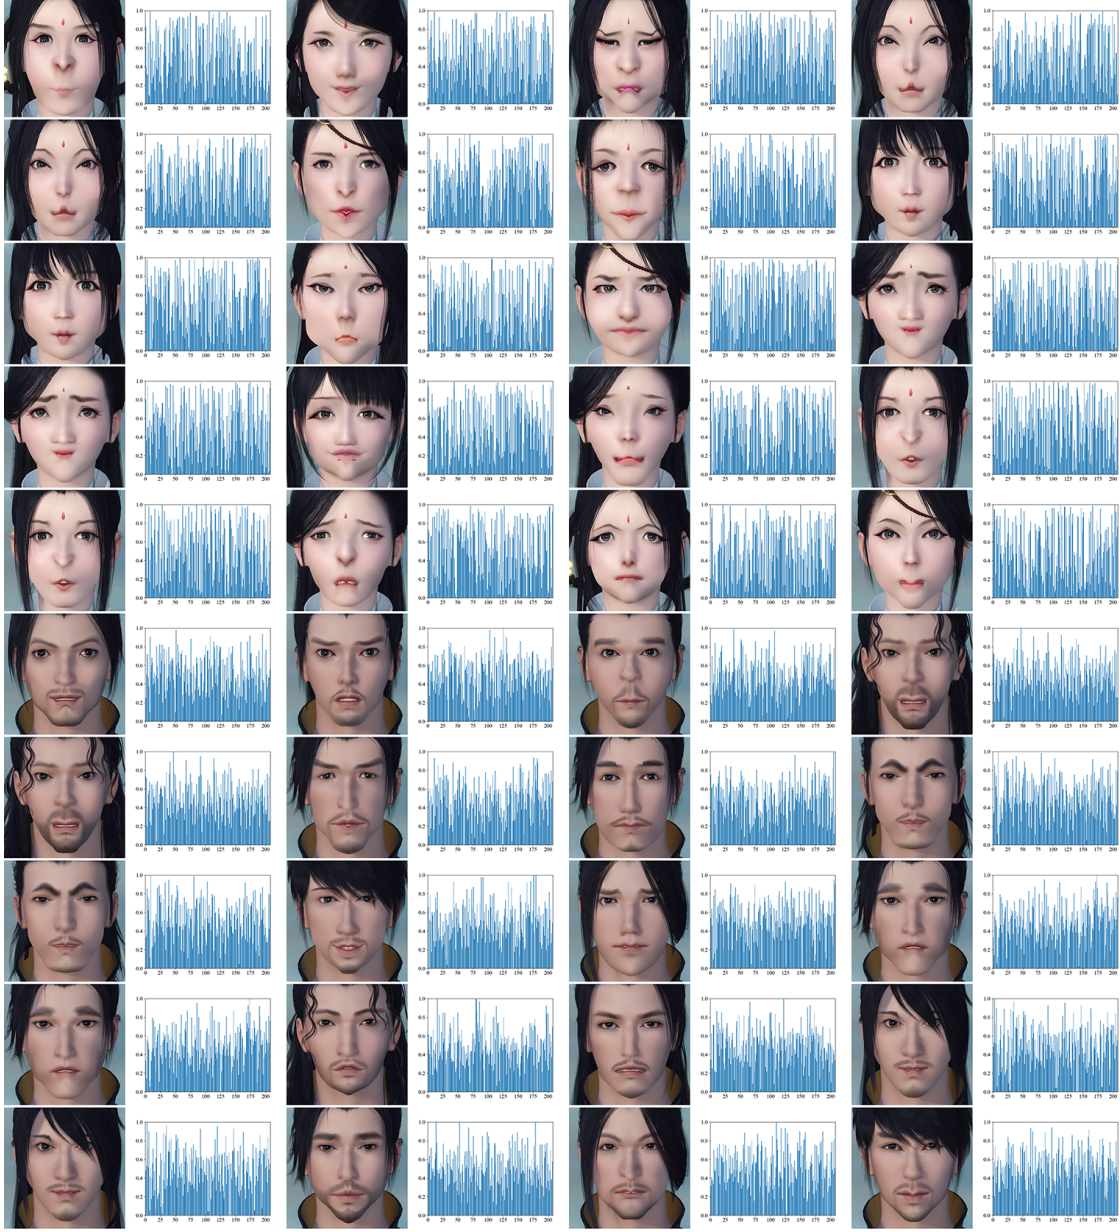

Figure 4: Training samples of imitator and the corresponding facial parameters.

## 5 A description of facial parameters

Table 3 lists a detailed description of each facial parameter, where the “Component” represents the facial parts which parameters belong to, the “Controllers” represents user-adjustable parameters of each facial part (one controller correspond to one continuous parameter), and the “# Controllers” represents the total number of controllers, i.e. 208. Besides, there are additional 102 discrete parameters for female (22 hair styles, 36 eyebrow styles, 19 lipstick styles, and 25 lipstick colors) and 56 discrete parameters for male (23 hair styles, 26 eyebrow styles, and 7 beard styles).

| Component |                      | Controllers                                    | # controllers | Sum |
|-----------|----------------------|------------------------------------------------|---------------|-----|
| Eyebrow   | eyebrow-head         | horizontal-offset, vertical-offset, slope, ... | 8             | 208 |
|           | eyebrow-body         | horizontal-offset, vertical-offset, slope, ... | 8             |     |
|           | eyebrow-tail         | horizontal-offset, vertical-offset, slope, ... | 8             |     |
| Eye       | whole                | horizontal-offset, vertical-offset, slope, ... | 6             |     |
|           | outside upper eyelid | horizontal-offset, vertical-offset, slope, ... | 9             |     |
|           | inside upper eyelid  | horizontal-offset, vertical-offset, slope, ... | 9             |     |
|           | lower eyelid         | horizontal-offset, vertical-offset, slope, ... | 9             |     |
|           | inner corner         | horizontal-offset, vertical-offset, slope, ... | 9             |     |
|           | outer corner         | horizontal-offset, vertical-offset, slope, ... | 9             |     |
| Nose      | whole                | vertical-offset, front-back, slope             | 3             |     |
|           | bridge               | vertical-offset, front-back, slope, ...        | 6             |     |
|           | wing                 | horizontal-offset, vertical-offset, slope, ... | 9             |     |
|           | tip                  | vertical-offset, front-back, slope, ...        | 6             |     |
|           | bottom               | vertical-offset, front-back, slope, ...        | 6             |     |
| Mouth     | whole                | vertical-offset, front-back, slope             | 3             |     |
|           | middle upper lip     | vertical-offset, front-back, slope, ...        | 6             |     |
|           | outer upper lip      | horizontal-offset, vertical-offset, slope, ... | 9             |     |
|           | middle lower lip     | vertical-offset, front-back, slope, ...        | 6             |     |
|           | outer lower lip      | horizontal-offset, vertical-offset, slope, ... | 9             |     |
|           | corner               | horizontal-offset, vertical-offset, slope, ... | 9             |     |
| Face      | forehead             | vertical-offset, front-back, slope, ...        | 6             |     |
|           | glabellum            | vertical-offset, front-back, slope, ...        | 6             |     |
|           | cheekbone            | horizontal-offset, vertical-offset, slope, ... | 5             |     |
|           | risorius             | horizontal-offset, vertical-offset, slope, ... | 5             |     |
|           | cheek                | horizontal-offset, vertical-offset, width, ... | 6             |     |
|           | jaw                  | vertical-offset, front-back, slope, ...        | 6             |     |
|           | lower jaw            | horizontal-offset, vertical-offset, slope, ... | 9             |     |
|           | mandibular corner    | horizontal-offset, vertical-offset, slope, ... | 9             |     |
|           | outer jaw            | horizontal-offset, vertical-offset, slope, ... | 9             |     |

Table 3: A detailed interpretation of each facial parameter (continuous part).

## References

- [1] Leon A. Gatys, Alexander S. Ecker, and Matthias Bethge. Image style transfer using convolutional neural networks. In *The IEEE Conference on Computer Vision and Pattern Recognition (CVPR)*, June 2016.
- [2] Shuyang Gu, Congliang Chen, Jing Liao, and Lu Yuan. Arbitrary style transfer with deep feature reshuffle. In *The IEEE Conference on Computer Vision and Pattern Recognition (CVPR)*, June 2018.
- [3] Kaiming He, Xiangyu Zhang, Shaoqing Ren, and Jian Sun. Deep residual learning for image recognition. In *The IEEE Conference on Computer Vision and Pattern Recognition (CVPR)*, June 2016.
- [4] Anh Tuan Tran, Tal Hassner, Iacopo Masi, and Gerard Medioni. Regressing robust and discriminative 3d morphable models with a very deep neural network. In *The IEEE Conference on Computer Vision and Pattern Recognition (CVPR)*, July 2017.
- [5] Xiang Wu, Ran He, Zhenan Sun, and Tieniu Tan. A light cnn for deep face representation with noisy labels. *IEEE Transactions on Information Forensics and Security*, 13(11):2884–2896, 2018.
